# Supplementary material for: Magnetic ternary nanohybrids for nonviral gene delivery of stem cells and applications on cancer therapy
Source: PubMed Central journal article supplement — Theranostics. 2019 Apr 13;9(8):2411–23. doi: 10.7150/thno.29326 (PMC6531296; doi:10.7150/thno.29326), 2019-04-13
Supplement: thnov09p2411s1.pdf [file thnov09p2411s1.pdf]

1 **Supported Information**

2

3 Magnetic ternary nanohybrids for nonviral gene delivery of stem cells and applications on  
4 cancer therapy

5 *Rih-Yang Huang, Yee-Hsien Lin, Ssu-Yu Lin, Yi-Nan Li, Chi-Shiun Chiang, and Chien-Wen Chang*

6

7

## 1 ***Material and methods***

### 2 **FITC-HA-SPIO Synthesis**

3 FITC modified HA (FITC-HA) was first synthesized for preparing FITC-HA-SPIO. 100 mg HA were  
4 dissolved in 4 mL formamide with gentle agitation for 12 hours. 50 mg of sodium bicarbonate (Sigma-  
5 Aldrich), 50 mg of dibutyltin dilaurate (TCI) and 100 mg FITC (Sigma-Aldrich) were dissolved in 2.5 mL  
6 DMSO and added slowly into HA solution. The mixture was stirred on a steam bath for 30 minutes. The  
7 reactant was then dialysis against water for 2 days and subjected to lyophilization. The product was  
8 reconstituted in deionized water and precipitated in ethanol to remove remaining FITC. Ligand exchange  
9 process, mentioned previously, was used to modified FITC-HA into OA-SPIO. To ensure the successful  
10 preparation of FITC-HA-SPIO, same amount of HA-SPIO or FITC-HA-SPIO were suspended in  
11 deionized water and the fluorescence spectrum of each sample was characterized.

### 12 **Cellular uptake**

13 To monitored the internalized SPIO, FITC-HA-SPIO was used to prepare MTN. Fifty thousand of hMSCs  
14 were seeded on the glass coverslips in 24-well plates and cultured at 37°C; 5% CO<sub>2</sub> overnight. <sup>PAE</sup>MTN  
15 using FITC-HA-SPIO was prepared and transfecting hMSCs as previously described. Afterward, the cells  
16 were washed with PBS twice. 4 or 24 hours after transfection, the cells were stained with LysoTracker™  
17 Red DND-99 (ThermoFisher) at 300 nM for 30 minutes. Cells were then washed with PBS twice and  
18 fixed by 4% PFA/PBS for 10 minutes. The cell nucleus was stained by Hoechst 33342. The cover slip was  
19 mounted on the microslide and sealed with nail polish. The fluorescence cell imaging was visualized by  
20 CLSM (LSM 510, Zeiss)

### 21 **Biodistribution**

22 The animals were handled in accordance to the animal use protocol of the National Tsing Hua University,  
23 Hsinchu, Taiwan. The mice were orthotopic inoculated human glioma cells (U87MG cells) as described

1 previously.  $2 \times 10^5$  Luciferase expressed hMSCs ( $^{Luc}hMSCs$ ) in 2  $\mu$ L serum free F-12 medium were  
2 intracranial injected or  $^{Luc}hMSCs$  in 100  $\mu$ L PBS were intravenous injected into each nude mouse. At 4,  
3 24, 48 and 168 hours post-injection. The mice were intraperitoneal injected with *D*-luciferin (Promega) at  
4 injection dose of 125 mg/kg. The in vivo bioluminescent imaging was recorded at 10 minutes after *D*-  
5 luciferin injected.

6

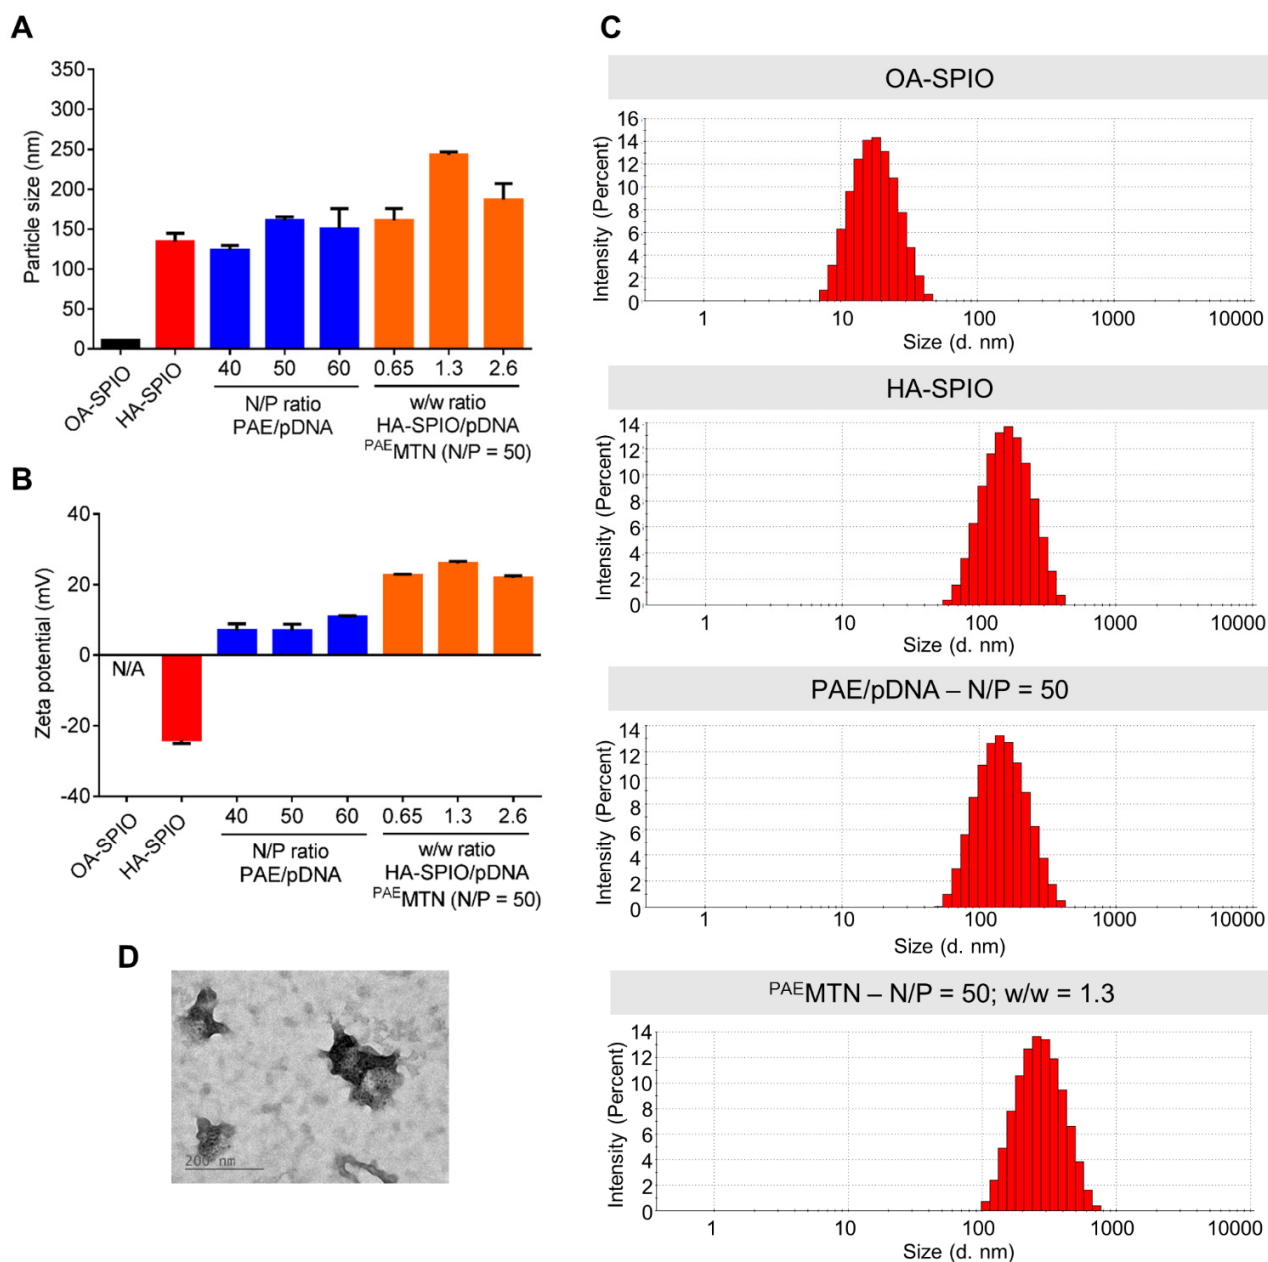

1

2 Figure S1. Physicochemical characterizations of <sup>PAE</sup>MTN. (A) Particle size and (B) Zeta potential of OA-

3 SPIO, HA-SPIO, PAE/pDNA polyplex and <sup>PAE</sup>MTN in aqueous phase at various N/P ratios. (C) The size

4 histogram of OA-SPIO, HA-SPIO, PAE/pDNA polyplex and <sup>PAE</sup>MTN. (D) TEM imaging of <sup>PAE</sup>MTN at

5 N/P ratio of 50 complexed with HA-SPIO at weight ratio (HA-SPIO/pDNA) of 1.3. Data are mean±s.e.m.

6 Data were measured from three independent experiments.

7

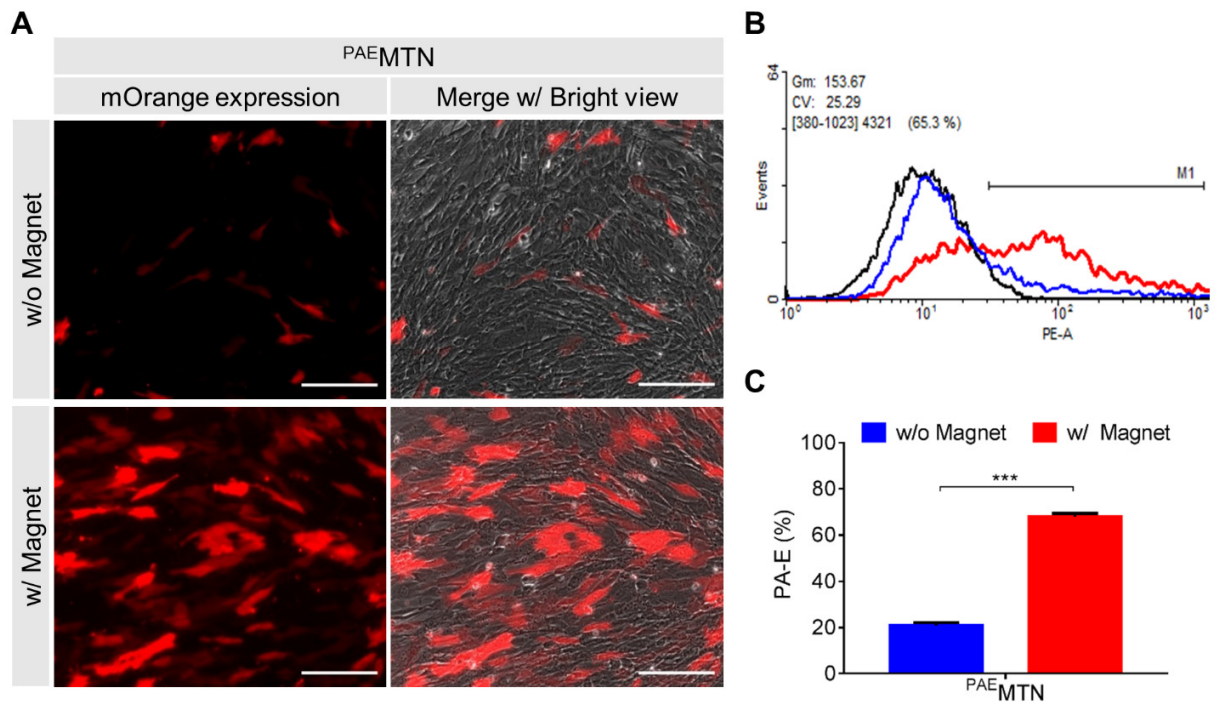

1

2 Figure S2. Transfection efficiency of <sup>PAE</sup>MTN on hMSCs by FACS analysis. The pcDNA3.mOrange  
 3 expression vector was used as reporter gene for evaluating the transfection efficiency. (A) fluorescence  
 4 images of hMSCs after transfection for 48 hours. (B) The histogram of hMSCs transfected by <sup>PAE</sup>MTN.  
 5 The colors of lines are represented as black: no-treatment; blue: MTN without magnetic field; red: MTN  
 6 with magnetic field. (C) Quantitation of transfection efficiency of MTN on hMSCs. Data are mean±s.e.m.  
 7 Data were measured from three independent experiments. \*P<0.05, \*\*P<0.01, and \*\*\*P<0.001 by  
 8 student's t-test.

9

10

11

1

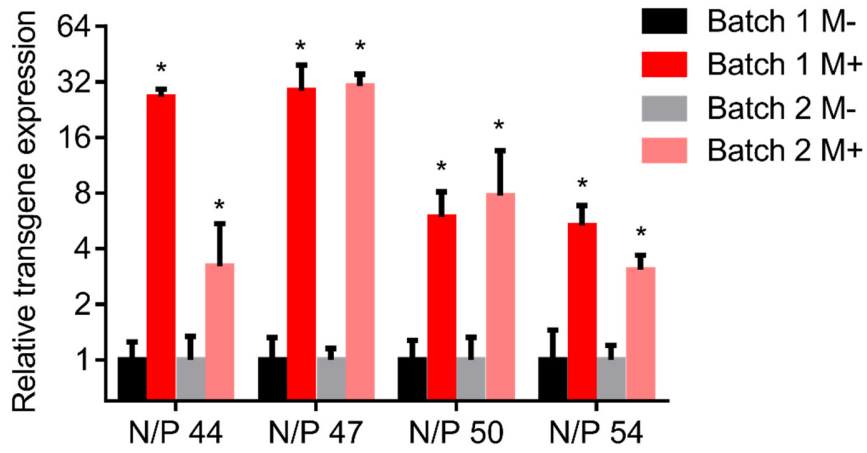

2

3 Figure S3. Comparison of transfection efficiency of <sup>f</sup>PAE-MTN on hMSCs from different donors (batch 1 &  
4 2). The transgene level was quantitated and normalized by luciferase assay. M-: without magnetic  
5 attraction. M+: with magnetic attraction. Data are mean±s.e.m. Data were measured from three  
6 independent experiments. \*P<0.05 by student's t-test.

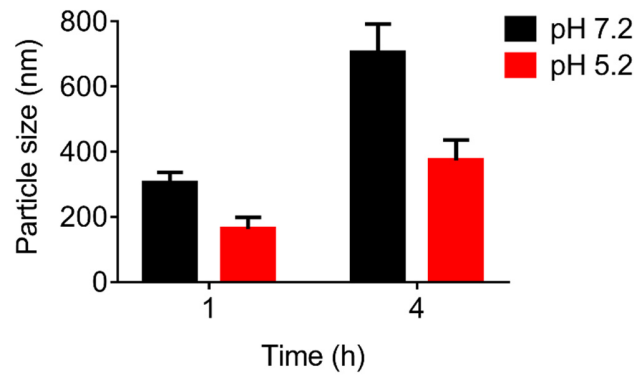

1

2 Figure S4. Colloidal stability of PAE/DNA polyplex in neutral or acidic condition. The fresh prepared  
3 PAE/DNA (N/P at 60) were incubated at neutral pH water or acetate buffer (pH 5.2) at 37°C for 1 hour or  
4 4 hours before particle size measurement by DLS. Data are mean±s.e.m. Data were measured from three  
5 independent experiments.

6

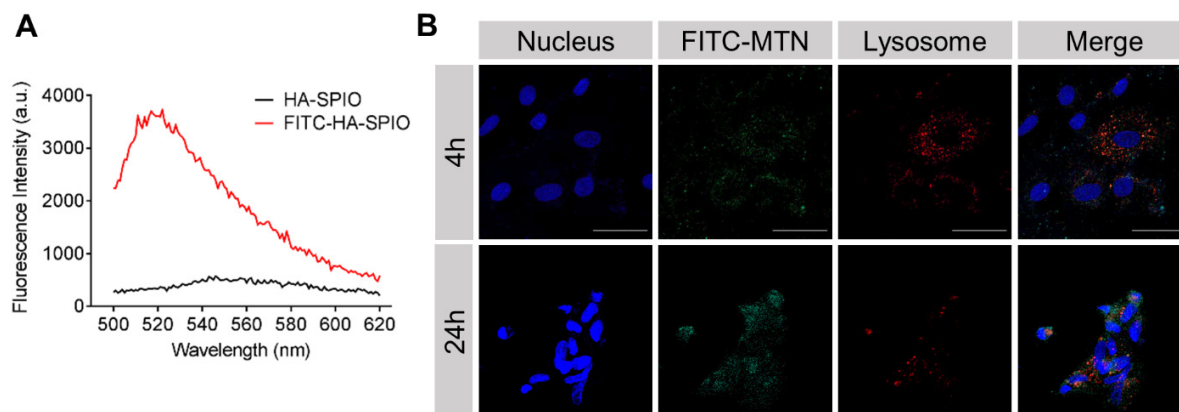

1

2 Figure S5. Intracellular trafficking study of FITC-MTN. (A) The fluorescence spectrum of HA-SPIO and

3 FITC-HA-SPIO at excitation wavelength of 480 nm. (B) Cellular uptake of <sup>PAE</sup>MTN using FITC-HA-

4 SPIO were visualized by confocal laser scanning microscopy (LSM 510, Zeiss). The green and red

5 fluorescence represented the intracellular location of HA-SPIO and endosome, respectively. Nucleus were

6 stained with Hoechst 33342 Scale bar in (B): 50  $\mu$ m.

7



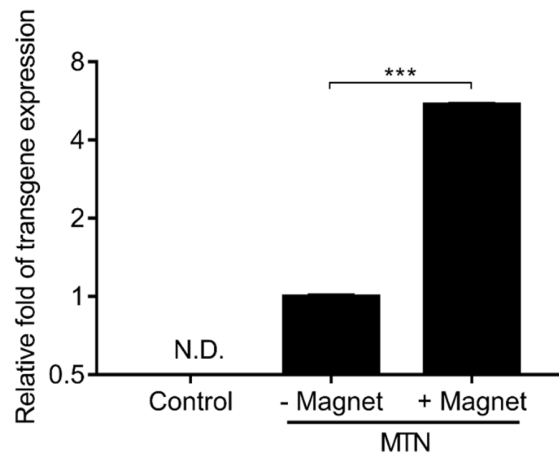

1

2 Figure S6. Real time PCR analysis of TRAIL mRNA expression from <sup>MTN</sup>hMSCs with or without applying  
3 external magnetic field. Forty-eight hours after transfection, the cells were collected, lyse for mRNA  
4 extraction and analysis. post-transfection. Data are mean±s.e.m. Data were measured from three  
5 independent experiments. \*P<0.05 by student's t-test.

6

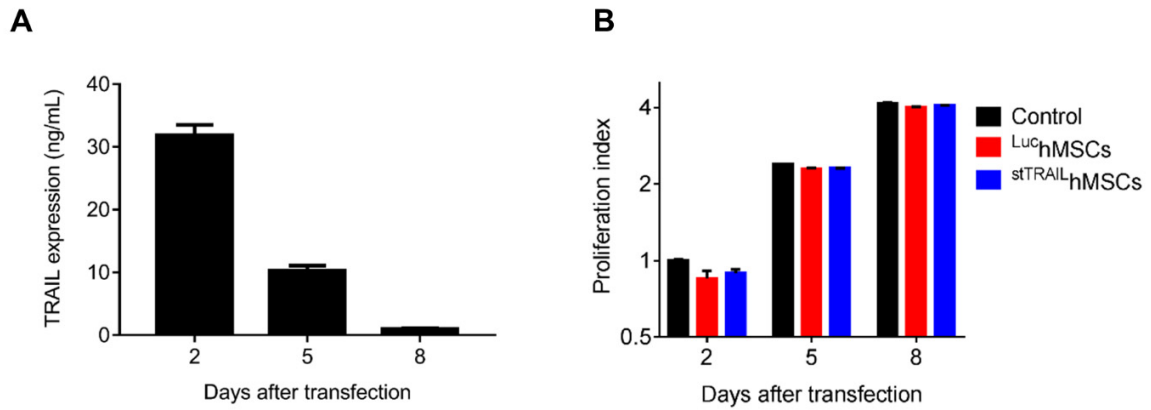

1

2 Figure S7. Time course TRAIL expression and cell proliferation of MTN-transfected hMSCs. (A) TRAIL

3 was quantitatively analyzed by ELISA. (B) Proliferation rate of the <sup>MTN/TRAIL</sup>hMSCs was evaluated by

4 DNA assay. Data are mean±s.e.m. Data were measured from three independent experiments.

5

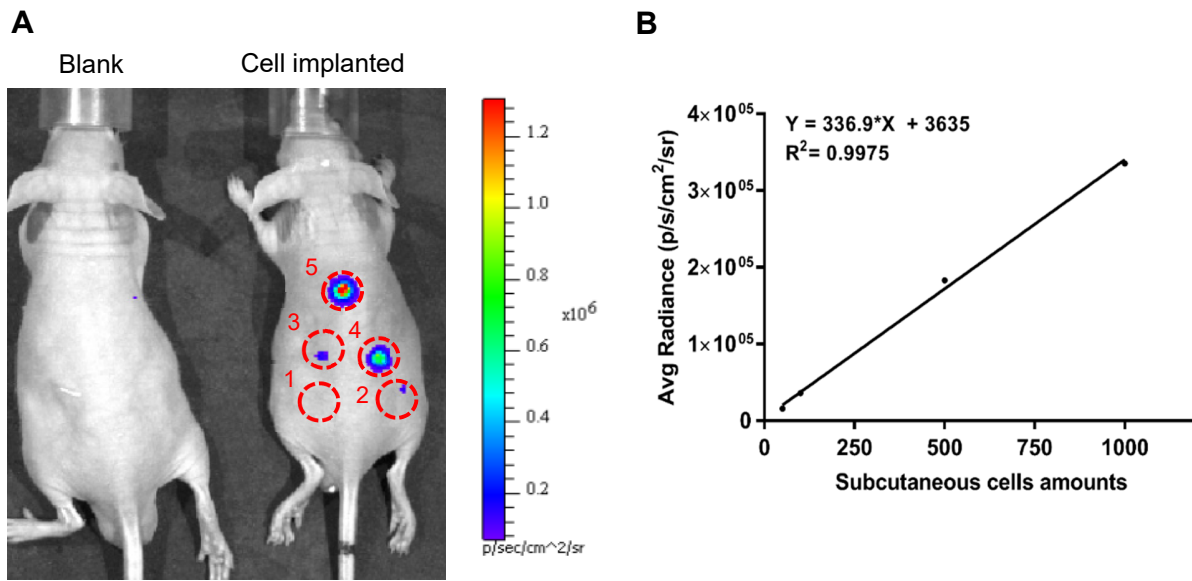

1

2 Figure S8. IVIS detection of various number of luciferase-stem cells (<sup>luc</sup>hMSCs) in vivo. (A) The nude  
 3 mouse was subcutaneously injected with <sup>luc</sup>hMSCs at defined cell amounts of 10 cells (No.1), 50 cells  
 4 (No.2), 100 cells (No.3), 500 cells (No.4) and 1000 cells (No.5). The bioluminescent images were recorded  
 5 at 4 hours after cells injection. (B) The graph of cells amounts to signals showed great proportional  
 6 correlation.

7

8

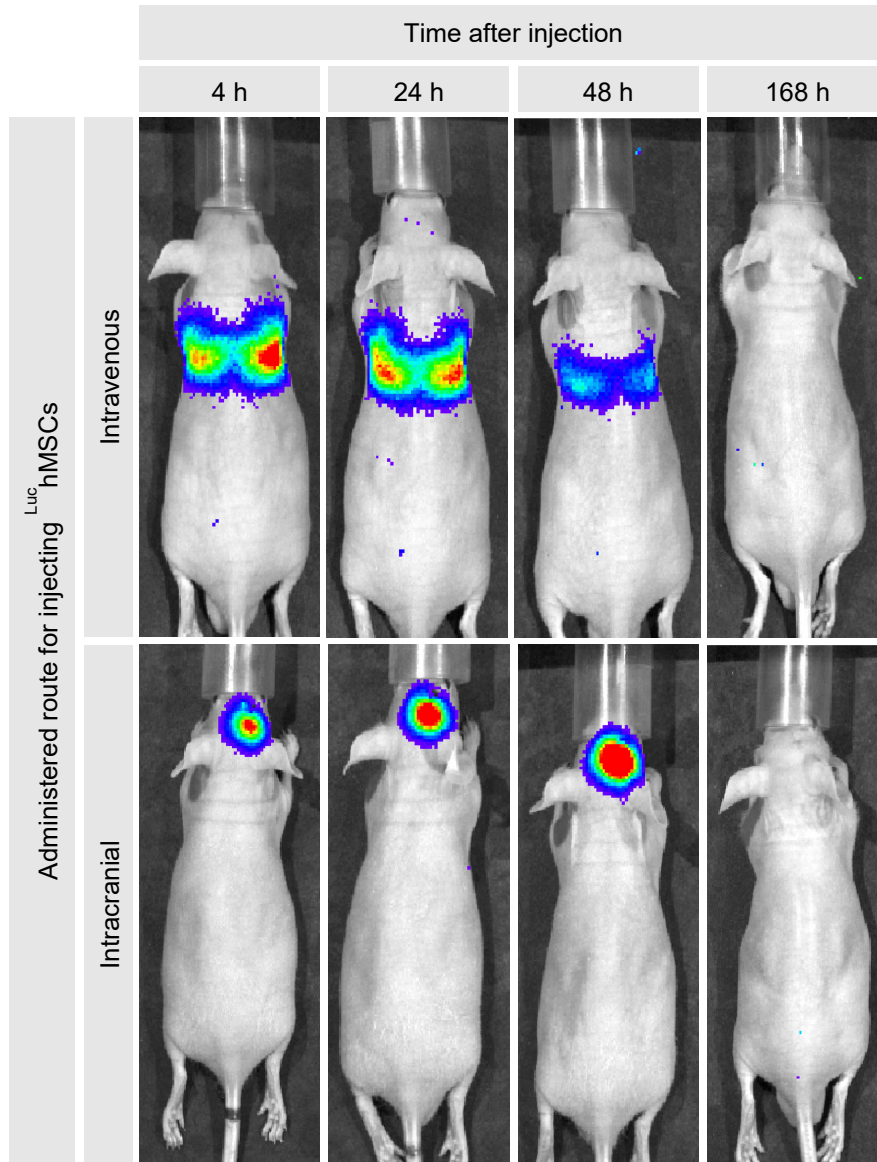

1

2 Figure S9. Biodistribution of <sup>Luc</sup>hMSCs in nude mice after intravenous or intracranial injection by IVIS.

3 <sup>Luc</sup>hMSCs were injected intravenously or intracranially into U87MG-bearing nude mice. The in vivo

4 bioluminescent images were acquired at 4, 24, 48 and 168 hours after injections.
